# Supplementary material
Source: PubMed Central journal article supplement (PMC4796292)
Supplement: Table_S1.pdf [file Table_S1.pdf]

**Table 1.** Bacterial taxa that differ between IBS (all subgroups) and healthy control

| Y Variable                 | Group | Mean<br>Abundance* | Std Dev. | Std Err. | N  | P       |
|----------------------------|-------|--------------------|----------|----------|----|---------|
| OTU438                     | IBS   | -2.611             | 0.945    | 0.127    | 55 | 0.04496 |
| OTU438                     | HC    | -2.097             | 0.63     | 0.157    | 16 | 0.04496 |
| Roseburia_OTU30            | IBS   | -3.521             | 0.789    | 0.106    | 55 | 0.04906 |
| Roseburia_OTU30            | HC    | -3.073             | 0.786    | 0.196    | 16 | 0.04906 |
| Lactobacillus              | IBS   | -3.182             | 0.729    | 0.098    | 55 | 0       |
| Lactobacillus              | HC    | -4.182             | 0.424    | 0.106    | 16 | 0       |
| Streptococcus thermophilus | IBS   | -2.343             | 0.699    | 0.094    | 55 | 0.03239 |
| Streptococcus thermophilus | HC    | -2.787             | 0.779    | 0.195    | 16 | 0.03239 |

\*mean of log10-transformed relative abundances
