# Supplementary material
Source: PubMed Central journal article supplement (PMC4796292)
Supplement: Table_S2.pdf [file Table_S2.pdf]

**Table 2.** Bacterial taxa that differ between IBS, IBS+bloat, IBS-bloat, and healthy controls

| Y Variable                           | Group        | Mean Abundance* | Std Dev. | Std Err. | N  | P ANOVA | P Tukey |
|--------------------------------------|--------------|-----------------|----------|----------|----|---------|---------|
| Lactobacillus                        | IBS Bloat    | -3.215          | 0.599    | 0.084    | 51 | 0       |         |
| Lactobacillus                        | IBS No Bloat | -2.995          | 1.465    | 0.598    | 6  | 0       | 0       |
| Lactobacillus                        | HC           | -4.283          | 0.344    | 0.092    | 14 | 0       | 0.001   |
| Anaerotruncus                        | IBS Bloat    | -3.479          | 0.563    | 0.079    | 51 | 0.007   | 0.01    |
| Anaerotruncus                        | IBS No Bloat | -4.198          | 0.369    | 0.151    | 6  | 0.007   |         |
| Anaerotruncus                        | HC           | -3.767          | 0.571    | 0.153    | 14 | 0.007   |         |
| Streptococcus thermophilus LMG 18311 | IBS Bloat    | -2.379          | 0.692    | 0.097    | 51 | 0.007   |         |
| Streptococcus thermophilus LMG 18311 | IBS No Bloat | -1.887          | 0.567    | 0.232    | 6  | 0.007   | 0.034   |
| Streptococcus thermophilus LMG 18311 | HC           | -2.913          | 0.746    | 0.199    | 14 | 0.007   | 0.01    |
| Ruminococcaceae                      | IBS Bloat    | -0.954          | 0.584    | 0.082    | 51 | 0.009   | 0.011   |
| Ruminococcaceae                      | IBS No Bloat | -1.703          | 1.02     | 0.416    | 6  | 0.009   |         |
| Ruminococcaceae                      | HC           | -0.841          | 0.242    | 0.065    | 14 | 0.009   | 0.009   |
| Streptococcus parasanguinis (T)      | IBS Bloat    | -3.381          | 0.671    | 0.094    | 51 | 0.011   |         |
| Streptococcus parasanguinis (T)      | IBS No Bloat | -2.861          | 0.912    | 0.372    | 6  | 0.011   | 0.071   |
| Streptococcus parasanguinis (T)      | HC           | -3.843          | 0.623    | 0.166    | 14 | 0.011   | 0.012   |
| Streptococcus                        | IBS Bloat    | -2.255          | 0.642    | 0.09     | 51 | 0.013   |         |
| Streptococcus                        | IBS No Bloat | -1.776          | 0.546    | 0.223    | 6  | 0.013   | 0.078   |
| Streptococcus                        | HC           | -2.679          | 0.653    | 0.175    | 14 | 0.013   | 0.014   |
| Subdoligranulum variabile DSM 15176  | IBS Bloat    | -2.047          | 1.115    | 0.156    | 51 | 0.023   | 0.017   |
| Subdoligranulum variabile DSM        | IBS No Bloat | -3.4            | 1.23     | 0.502    | 6  | 0.023   |         |

|                                     |              |        |       |       |    |       |       |
|-------------------------------------|--------------|--------|-------|-------|----|-------|-------|
| Subdoligranulum variabile DSM 15176 | HC           | -2.248 | 1.038 | 0.277 | 14 | 0.023 |       |
| OTU4438                             | IBS Bloat    | -3.6   | 0.742 | 0.104 | 51 | 0.028 |       |
| OTU4438                             | IBS No Bloat | -4.059 | 0.659 | 0.269 | 6  | 0.028 |       |
| OTU4438                             | HC           | -3.152 | 0.653 | 0.174 | 14 | 0.028 | 0.032 |
| OTU2915                             | IBS Bloat    | -3.199 | 0.916 | 0.128 | 51 | 0.03  |       |
| OTU2915                             | IBS No Bloat | -3.847 | 1.017 | 0.415 | 6  | 0.03  |       |
| OTU2915                             | HC           | -2.682 | 0.838 | 0.224 | 14 | 0.03  | 0.028 |
| Anaerovorax_OTU14                   | IBS Bloat    | -3.432 | 0.608 | 0.085 | 51 | 0.036 | 0.028 |
| Anaerovorax_OTU14                   | IBS No Bloat | -4.136 | 0.688 | 0.281 | 6  | 0.036 |       |
| Anaerovorax_OTU14                   | HC           | -3.476 | 0.631 | 0.169 | 14 | 0.036 |       |
| Oscillibacter_OTU4                  | IBS Bloat    | -2.704 | 0.73  | 0.102 | 51 | 0.052 |       |
| Oscillibacter_OTU4                  | IBS No Bloat | -3.369 | 0.909 | 0.371 | 6  | 0.052 |       |
| Oscillibacter_OTU4                  | HC           | -2.494 | 0.626 | 0.167 | 14 | 0.052 | 0.042 |

--- IBS+B = IBS with Bloating; IBS-B = IBS without Bloating; HC=Healthy Controls

\*mean of log10-transformed relative abundances
