# Supplementary material
Source: PubMed Central journal article supplement (PMC4796292)
Supplement: Table_S3.pdf [file Table_S3.pdf]

**Table 3.** Bacterial taxa that differ between IBS, D-IBS, C-IBS, M-IBS and healthy controls

| Rank    | Taxon                      | Group | Mean Abundance* | Std Dev. | Std Err | N  | P-ANOVA | Significant Groups | P-Tukey |
|---------|----------------------------|-------|-----------------|----------|---------|----|---------|--------------------|---------|
| species | Collinsella_OTU0           | D-IBS | -2.785          | 1.276    | 0.285   | 20 | 0.037   |                    |         |
| species | Collinsella_OTU0           | C-IBS | -1.85           | 0.697    | 0.145   | 23 | 0.037   | C-IBS              | 0.043   |
| species | Collinsella_OTU0           | M-IBS | -2.645          | 1.362    | 0.378   | 13 | 0.037   |                    |         |
| species | Collinsella_OTU0           | HC    | -2.645          | 1.262    | 0.326   | 15 | 0.037   |                    |         |
| species | OTU438                     | D-IBS | -2.492          | 1.095    | 0.245   | 20 | 0.058   |                    |         |
| species | OTU438                     | C-IBS | -2.495          | 0.665    | 0.139   | 23 | 0.058   |                    |         |
| species | OTU438                     | M-IBS | -2.995          | 1.048    | 0.291   | 13 | 0.058   | M-IBS/HC           | 0.033   |
| species | OTU438                     | HC    | -2.065          | 0.639    | 0.165   | 15 | 0.058   |                    |         |
| species | Streptococcus thermophilus | D-IBS | -2.425          | 0.695    | 0.155   | 20 | 0.042   |                    |         |
| species | Streptococcus thermophilus | C-IBS | -2.171          | 0.592    | 0.123   | 23 | 0.042   |                    |         |
| species | Streptococcus thermophilus | M-IBS | -2.469          | 0.861    | 0.239   | 13 | 0.042   |                    |         |
| species | Streptococcus thermophilus | HC    | -2.862          | 0.746    | 0.192   | 15 | 0.042   | HC                 | 0.023   |
| species | OTU2063                    | D-IBS | -2.958          | 0.886    | 0.198   | 20 | 0.036   |                    |         |
| species | OTU2063                    | C-IBS | -3.257          | 0.654    | 0.136   | 23 | 0.036   |                    |         |
| species | OTU2063                    | M-IBS | -3.649          | 0.934    | 0.259   | 13 | 0.036   |                    |         |
| species | OTU2063                    | HC    | -2.843          | 0.719    | 0.186   | 15 | 0.036   | HC                 | 0.044   |
| species | Anaerovorax_OTU14          | D-IBS | -3.713          | 0.59     | 0.132   | 20 | 0.001   | D-IBS              | 0.005   |
| species | Anaerovorax_OTU14          | C-IBS | -3.103          | 0.497    | 0.104   | 23 | 0.001   | C-IBS/M-IBS        | 0.001   |
| species | Anaerovorax_OTU14          | M-IBS | -3.879          | 0.646    | 0.179   | 13 | 0.001   |                    |         |

|         |                   |       |        |       |       |    |       |          |       |
|---------|-------------------|-------|--------|-------|-------|----|-------|----------|-------|
| species | Anaerovorax_OTU14 | HC    | -3.496 | 0.613 | 0.158 | 15 | 0.001 |          |       |
| species | Roseburia_OTU15   | D-IBS | -3.492 | 0.479 | 0.107 | 20 | 0.016 |          |       |
| species | Roseburia_OTU15   | C-IBS | -3.996 | 0.434 | 0.091 | 23 | 0.016 | C-IBS    | 0.009 |
| species | Roseburia_OTU15   | M-IBS | -3.823 | 0.609 | 0.169 | 13 | 0.016 |          |       |
| species | Roseburia_OTU15   | HC    | -3.722 | 0.523 | 0.135 | 15 | 0.016 |          |       |
| genus   | Collinsella       | D-IBS | -2.774 | 1.278 | 0.286 | 20 | 0.039 |          |       |
| genus   | Collinsella       | C-IBS | -1.841 | 0.698 | 0.146 | 23 | 0.039 | C-IBS    | 0.034 |
| genus   | Collinsella       | M-IBS | -2.518 | 1.255 | 0.348 | 13 | 0.039 |          |       |
| genus   | Collinsella       | HC    | -2.578 | 1.185 | 0.306 | 15 | 0.039 |          |       |
| genus   | Streptococcus     | D-IBS | -2.277 | 0.612 | 0.137 | 20 | 0.061 |          |       |
| genus   | Streptococcus     | C-IBS | -2.05  | 0.539 | 0.112 | 23 | 0.061 |          |       |
| genus   | Streptococcus     | M-IBS | -2.377 | 0.856 | 0.237 | 13 | 0.061 |          |       |
| genus   | Streptococcus     | HC    | -2.639 | 0.648 | 0.167 | 15 | 0.061 | HC       | 0.039 |
| genus   | Oscillibacter     | D-IBS | -2.817 | 0.812 | 0.182 | 20 | 0.032 |          |       |
| genus   | Oscillibacter     | C-IBS | -2.118 | 0.746 | 0.156 | 23 | 0.032 | C-IBS    | 0.028 |
| genus   | Oscillibacter     | M-IBS | -2.587 | 0.968 | 0.269 | 13 | 0.032 |          |       |
| genus   | Oscillibacter     | HC    | -2.275 | 0.68  | 0.176 | 15 | 0.032 |          |       |
| genus   | Lactobacillus     | D-IBS | -3.149 | 0.274 | 0.061 | 20 | 0     |          |       |
| genus   | Lactobacillus     | C-IBS | -3.037 | 0.699 | 0.146 | 23 | 0     |          |       |
| genus   | Lactobacillus     | M-IBS | -3.502 | 1.108 | 0.307 | 13 | 0     | M-IBS/HC | 0.022 |
| genus   | Lactobacillus     | HC    | -4.237 | 0.376 | 0.097 | 15 | 0     | HC       | 0     |
| genus   | Eubacterium       | D-IBS | -2.743 | 0.974 | 0.218 | 20 | 0.024 |          |       |
| genus   | Eubacterium       | C-IBS | -3.078 | 0.934 | 0.195 | 23 | 0.024 |          |       |
| genus   | Eubacterium       | M-IBS | -3.721 | 0.903 | 0.25  | 13 | 0.024 | M-IBS/HC | 0.03  |
| genus   | Eubacterium       | HC    | -2.709 | 1.062 | 0.274 | 15 | 0.024 | M-IBS/HC | 0.037 |

|        |                     |       |        |       |       |    |       |             |       |
|--------|---------------------|-------|--------|-------|-------|----|-------|-------------|-------|
| genus  | Anaerovorax         | D-IBS | -3.397 | 0.634 | 0.142 | 20 | 0.004 | D-IBS/C-IBS | 0.011 |
| genus  | Anaerovorax         | C-IBS | -2.744 | 0.558 | 0.116 | 23 | 0.004 | C-IBS/M-IBS | 0.011 |
| genus  | Anaerovorax         | M-IBS | -3.489 | 0.78  | 0.216 | 13 | 0.004 |             |       |
| genus  | Anaerovorax         | HC    | -3.062 | 0.761 | 0.197 | 15 | 0.004 |             |       |
| genus  | Actinomyces         | D-IBS | -3.625 | 0.54  | 0.121 | 20 | 0.014 |             |       |
| genus  | Actinomyces         | C-IBS | -3.69  | 0.449 | 0.094 | 23 | 0.014 | C-IBS/M-IBS | 0.03  |
| genus  | Actinomyces         | M-IBS | -3.806 | 0.376 | 0.104 | 13 | 0.014 |             |       |
| genus  | Actinomyces         | HC    | -4.137 | 0.495 | 0.128 | 15 | 0.014 | HC          | 0.013 |
| family | Coriobacteriaceae   | D-IBS | -2.291 | 0.863 | 0.193 | 20 | 0.025 |             |       |
| family | Coriobacteriaceae   | C-IBS | -1.667 | 0.453 | 0.094 | 23 | 0.025 | C-IBS       | 0.021 |
| family | Coriobacteriaceae   | M-IBS | -2.101 | 0.703 | 0.195 | 13 | 0.025 |             |       |
| family | Coriobacteriaceae   | HC    | -2.147 | 0.7   | 0.181 | 15 | 0.025 |             |       |
| family | Lactobacillaceae    | D-IBS | -3.093 | 0.416 | 0.093 | 20 | 0     |             |       |
| family | Lactobacillaceae    | C-IBS | -3.037 | 0.699 | 0.146 | 23 | 0     | C-IBS/HC    | 0     |
| family | Lactobacillaceae    | M-IBS | -3.502 | 1.108 | 0.307 | 13 | 0     | M-IBS/HC    | 0     |
| family | Lactobacillaceae    | HC    | -4.237 | 0.376 | 0.097 | 15 | 0     | HC          | 0.028 |
| family | Eubacteriaceae      | D-IBS | -2.703 | 0.929 | 0.208 | 20 | 0.031 |             |       |
| family | Eubacteriaceae      | C-IBS | -3.048 | 0.924 | 0.193 | 23 | 0.031 |             |       |
| family | Eubacteriaceae      | M-IBS | -3.645 | 0.889 | 0.247 | 13 | 0.031 | M-IBS       | 0.035 |
| family | Eubacteriaceae      | HC    | -2.703 | 1.061 | 0.274 | 15 | 0.031 |             |       |
| family | Incertae Sedis XIII | D-IBS | -3.317 | 0.627 | 0.14  | 20 | 0.016 |             |       |
| family | Incertae Sedis XIII | C-IBS | -2.729 | 0.574 | 0.12  | 23 | 0.016 | C-IBS/D-IBS | 0.026 |
| family | Incertae Sedis XIII | M-IBS | -3.341 | 0.841 | 0.233 | 13 | 0.016 | M-IBS/C-    | 0.047 |

## IBS

|        |                     |       |        |       |       |    |       |             |       |
|--------|---------------------|-------|--------|-------|-------|----|-------|-------------|-------|
| family | Incertae Sedis XIII | HC    | -3.008 | 0.676 | 0.174 | 15 | 0.016 |             |       |
| family | Actinomycetaceae    | D-IBS | -3.625 | 0.54  | 0.121 | 20 | 0.011 |             |       |
| family | Actinomycetaceae    | C-IBS | -3.662 | 0.455 | 0.095 | 23 | 0.011 |             |       |
| family | Actinomycetaceae    | M-IBS | -3.806 | 0.376 | 0.104 | 13 | 0.011 |             |       |
| family | Actinomycetaceae    | HC    | -4.137 | 0.495 | 0.128 | 15 | 0.011 |             | 0.013 |
| order  | Lactobacillales     | D-IBS | -2.11  | 0.515 | 0.115 | 20 | 0.03  |             |       |
| order  | Lactobacillales     | C-IBS | -1.887 | 0.508 | 0.106 | 23 | 0.03  |             |       |
| order  | Lactobacillales     | M-IBS | -2.129 | 1.006 | 0.279 | 13 | 0.03  |             |       |
| order  | Lactobacillales     | HC    | -2.539 | 0.561 | 0.145 | 15 | 0.03  |             | 0.016 |
| order  | Coriobacteriales    | D-IBS | -2.291 | 0.863 | 0.193 | 20 | 0.025 |             |       |
| order  | Coriobacteriales    | C-IBS | -1.667 | 0.453 | 0.094 | 23 | 0.025 | C-IBS/D-IBS | 0.021 |
| order  | Coriobacteriales    | M-IBS | -2.101 | 0.703 | 0.195 | 13 | 0.025 |             |       |
| order  | Coriobacteriales    | HC    | -2.147 | 0.7   | 0.181 | 15 | 0.025 |             |       |
| order  | Actinomycetales     | D-IBS | -3.568 | 0.56  | 0.125 | 20 | 0.001 |             |       |
| order  | Actinomycetales     | C-IBS | -3.492 | 0.385 | 0.08  | 23 | 0.001 |             |       |
| order  | Actinomycetales     | M-IBS | -3.778 | 0.395 | 0.109 | 13 | 0.001 |             |       |
| order  | Actinomycetales     | HC    | -4.088 | 0.477 | 0.123 | 15 | 0.001 |             | 0.001 |
| phylum | Actinobacteria      | D-IBS | -2.225 | 0.801 | 0.179 | 20 | 0.019 |             |       |
| phylum | Actinobacteria      | C-IBS | -1.63  | 0.406 | 0.085 | 23 | 0.019 | C-IBS       | 0.019 |
| phylum | Actinobacteria      | M-IBS | -2.077 | 0.679 | 0.188 | 13 | 0.019 |             |       |
| phylum | Actinobacteria      | HC    | -2.125 | 0.687 | 0.177 | 15 | 0.019 |             |       |

D-IBS=Diarrhea predominant IBS; C-IBS=Constipation predominant IBS; M-IBS= IBS with mixed bowel pattern;

HC=Healthy controls

\*mean of log<sub>10</sub>-transformed relative abundances

\*\* P-value by ANOVA analyses
